# Supplementary material
Source: PubMed Central journal article supplement (PMC4252572)
Supplement: NIHMS615453-supplement-supplement_1.pdf [file NIHMS615453-supplement-supplement_1.pdf]

## SUPPORTING INFORMATION

### **Correlation Between Intraluminal Oxygen Gradient and Radial Partitioning of Intestinal Microbiota in Humans and Mice**

**Short title: Oxygen gradient and the gut microbiota**

Albenberg, LA<sup>1</sup>,<sup>a</sup> Esipova, TV<sup>3</sup>,<sup>a</sup> Judge, CP<sup>1</sup>, Bittinger, K<sup>4</sup>, Chen, J<sup>5</sup>, Laughlin, A., Grunberg, S<sup>4</sup>, Baldassano, RN<sup>1</sup>, Lewis, JD<sup>2,5</sup>, Li, H<sup>5</sup>, Thom, SR<sup>6</sup>, Bushman, FD<sup>4</sup>, Vinogradov, SA<sup>3,\*</sup> and Wu, GD<sup>2\*</sup>

<sup>1</sup>Division of Gastroenterology, Hepatology, and Nutrition, The Children's Hospital of Philadelphia, Philadelphia, PA 19104, USA;

<sup>2</sup>Division of Gastroenterology, <sup>3</sup>Department of Biochemistry and Biophysics, <sup>4</sup>Department of Microbiology, <sup>5</sup>Department of Biostatistics and Epidemiology, Perelman School of Medicine, University of Pennsylvania, Philadelphia, PA 19104; <sup>6</sup>Dept. of Emergency Medicine, University of Maryland, Baltimore, MD 21201

**Phosphorescent probe for intraluminal oximetry.** To prepare probe OxyphorMicro, polymethylmetacrylate (PMMA, Aldrich, 2 g) was dissolved in dichloromethane ( $\text{CH}_2\text{Cl}_2$ , 10 ml). Pd *meso*-tetraaryl-tetrabenzoporphyrin (1) (Fig. 1C main text) was added to a final concentration of  $\sim 20 \mu\text{M}$ , and the solution was added drop-wise to rigorously stirred hexane (50 ml). The initially formed fine precipitate coagulated, yielding a viscous mass, which was separated, washed on a filter with hexane (3x50 ml) and dried under vacuum. The resulting solid was transferred into a porcelain cup and ground to yield a greenish powder that was subsequently dried in vacuum and used directly in intraluminal oxygen measurements.

**Calibration of probe Oxyphor G4 in solution.** Probe Oxyphor G4 in aqueous solutions was calibrated according to the previously published method (1), using a setup developed specifically for oxygen titrations of phosphorescent probes (2, 3) and a home-built phosphorometer (1, 4).

**Calibration of probe OxyphorMicro in viscous (e.g. intraluminal) materials.** The setup used for calibration of semi-solid samples containing probe OxyphorMicro is shown in Fig. S1. A glass vial ( $\sim 2 \text{ cm}$  in diameter) with a gas-impermeable stopper and magnetic stirring bar was positioned inside a thermostat chamber. Temperature inside the chamber was controlled with up to  $\pm 0.1^\circ\text{C}$  accuracy. The chamber was equipped with a magnetic stirrer. An aqueous solution of Oxyphor G4 ( $5 \mu\text{M}$ ) was added to the vial to make up a  $\sim 5 \text{ mm}$ -high liquid layer. Above that layer, a plastic porous disk was positioned in order to support another small open-top glass vial ( $\sim 5 \text{ mm}$  in diameter). The small vial was placed next to the wall of the large vial, near the entry port for a pair of optical fibers (3 mm in diameter) for excitation and collection of phosphorescence. The fibers were ran through a channel in the thermostat and connected to the optical ports of the phosphorometer. A similar pair of fibers ran through another channel at the level of the liquid solution (Oxyphor G4) and attached to another phosphorometer.

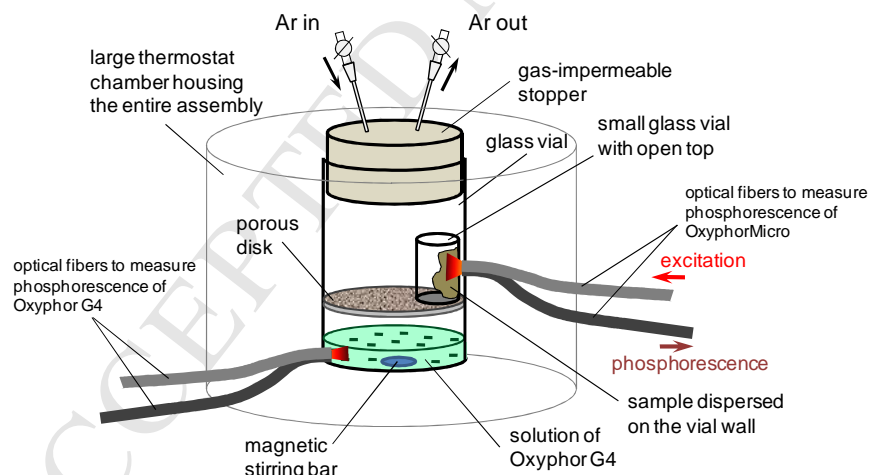

**Figure S1.** Setup used for calibration of phosphorescent probe OxyphorMicro in semi-solid samples.

A sample (e.g. a material extracted from the cecum of a mouse fed previously with chow containing OxyphorMicro), was deposited onto the wall of the small vial and spread on the wall to give a thin layer. The layer had to be thin in order to insure quick equilibration of the probe immersed in the material with the gas phase in the chamber. The vial was closed with the stopper containing two needle gas ports with stopcocks and left to equilibrate at  $36.5^\circ\text{C}$ , while the phosphorescence lifetime in both the sample and Oxyphor G4 solution was continuously monitored (at e.g. 10 s intervals), until the readings became stable. Importantly, because the sample at all times was inside the closed vial containing aqueous solution, it did not dry during

the calibration. Drying could cause changes in the sample viscosity, which, in spite of relative insensitivity of OxyphorMicro to the medium properties, still could affect the calibration.

After lifetime readings reached a stable baseline, both OxyphorMicro in the sample and Oxyphor G4 in aqueous solution were considered to be at equilibrium with air ( $pO_2 \sim 155$  mmHg, i.e. 21%  $O_2$  in the atmosphere at total pressure of 760 mmHg, minus the water vapor pressure at 36.5°C). This was confirmed by phosphorescence lifetime value of Oxyphor G4, which was pre-calibrated at exactly the same conditions (see above). The stopcock on the Ar inlet port was then opened for ca 5 s, after which both stopcocks were tightly closed. Letting in some Ar led to a rapid (seconds) rise in the phosphorescence lifetime of G4 to a new steady state, indicating that equilibration of the thin ( $\sim 5$  mm) stirred solution with the gas phase was very fast. In contrast, relatively slow rise in the lifetime of OxyphorMicro confirmed that diffusion of  $O_2$  in the viscous material and equilibration with the gas phase was significantly slower. Once the equilibrium was reached, and the phosphorescence lifetimes of both probes were stable, a new portion of Ar was let in, replacing some more oxygen; and the procedure was repeated many times, until all oxygen was replaced from the vial. At each steady state, readings from Oxyphor G4 provided independent and accurate measurements of  $pO_2$ . An example trace recording is shown in Fig. S3, while superimposed calibration traces of three samples from three different mice are shown in Fig. 1 (main text). Similar curves were obtained when OxyphorMicro was mixed with artificial viscous material, e.g. toothpaste AquaFresh, and titrated in the same manner. The obtained data were fit to an arbitrary analytical function (e.g. hyperbola), which was used to convert phosphorescence lifetimes to oxygen pressures in *in vivo* experiments.

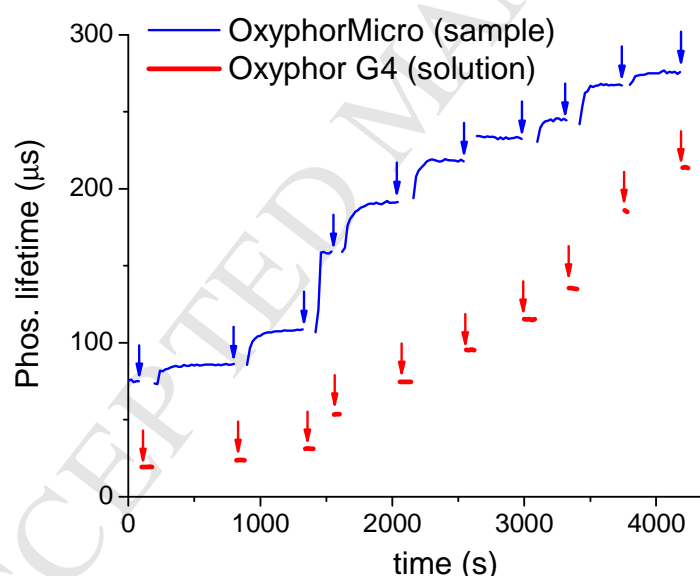

**Figure S2.** Typical calibration plot obtained using the setup shown in Fig. S1. Blue arrows indicate time points when readings of phosphorescence lifetimes of OxyphorMicro were taken, while red arrows show the matching lifetimes for solution of Oxyphor G4, from which  $pO_2$  values were calculated.

*Oxygen measurements in intestinal tissue and lumen of the gut.* Oxygen measurements in the intestinal tissue of mice followed the protocols described previously (1). Oxyphor G4 (200  $\mu M$ ) was injected into the tail vein to an estimated final concentration in the blood plasma of  $\sim 2$   $\mu M$ . OxyphorMicro was admixed with chow to measure luminal oxygenation. In order to examine the effect of the host tissue oxygenation on intraluminal oxygen content, mice with the probe in the vasculature or in the lumen were subjected to brief periods of inhalation of pure oxygen through the anesthesia apparatus.

The optical configuration (Fig. 1A) resembled that used in our previous studies (1). A pair of closely positioned optical fibers (2 mm in diameter) for excitation and collection of phosphorescence were positioned right at the extraluminal surface of intestinal tissue. The probe in the tissue or lumen was excited by 10  $\mu$ s-long pulses from an LED (635 nm) near the maximum of the absorption Q-band of Pd tetrabenzoporphyrin (Fig. 1B and C), and the phosphorescence was digitized (333 kHz) during 2 ms-long acquisition period. 100-400 decays (0.5-2 s total acquisition time) were averaged to obtain adequate signal-to-noise ratios (SNR). The resulting decays (Fig. 1B) were analyzed on-the-fly by the least-squares method using single-exponential model. The recovered decay times were converted into oxygen concentrations by applying Stern-Volmer calibration curves obtained independently (Fig. 1D; see SI for details of calibration experiments).

*Human samples.* Oxygen tolerance of bacterial taxa found in human biopsy specimens versus stool samples used samples collected during a controlled inpatient feeding study(5). Stool samples and rectal biopsy samples, through un-prepped flexible sigmoidoscopy, were collected on days 1 and 10. Paired rectal swab and stool samples were collected within 24 hours of each other from an additional 7 pediatric patients, ages 3-12, seen at The Children's Hospital of Philadelphia. Exclusion criteria included subjects with perianal disease and the use of antibiotics or probiotics between the two sample collections. Rectal swab samples, obtained during a routine clinical exam used a dry swab (CopanFlock Technologies) that was inserted 2-3 cm into the rectum, turned 360°, removed, placed into a coded sterile tube, and frozen at -80°C until analysis. The stool samples from the subjects in this study were collected and stored using previously described methods (5).

*Hyperbaric Oxygen Therapy (HBOT) of mice.* 5 female C57B6/J mice, 8 weeks of age underwent hyperbaric oxygen therapy (HBOT). Pure oxygen (medical grade, 98%) at 2.0 atmospheres absolute pressure (ATA) was delivered daily for 2 hours per day for 5 consecutive days using a Bethlehem Steel Corp. Model G15-APSP hyperbaric chamber following a published protocol (6). After 48 hours of recovery time, the animals again underwent HBOT using the same 2 hour cycle for an additional 4 consecutive days. A second group of 5 control mice (same strain, sex, and age) were also placed into HBOT chambers for the same period of time but ambient oxygen and atmospheric pressure were maintained. During the study period, all animals were fed the same, normal chow diet (AIN-76, Research Diets). Fecal pellets were collected for 16S rRNA gene sequencing from each animal on day 1 (before therapy), and after 4, 6, and 9 days of therapy.

*16S rRNA gene sequencing and bioinformatics.* Sequence reads were acquired using the 454/Roche or Illumina platforms, and are available at the SRA. Reads were analyzed using QIIME version 1.6.0-dev(7). To control for quality, reads were required to have a perfect match to the molecular barcode of a sample and to the leading 16S primer sequence. Reads were removed from the analysis if they were less than 200bp in length, had more than 1 ambiguous base, or contained a homopolymer run longer than 6bp. OTUs were selected by clustering the sequences at 97% similarity with UCLUST version 1.2.22. Taxonomic assignments were generated with the RDP Classifier version 2.5, using the default RDP taxonomy. A phylogenetic tree was constructed with FastTree version 2.1.1, using the representative sequences for each OTU as input. Weighted and unweightedUniFrac distances were calculated for each pair of samples using the implementation in the PyCogent python library. To estimate the functional profile for each sample, the reads were processed with PICRUST version 1.0.0, using the instructions included with the software(8). For presence-absence analysis, we tested taxa that were present in at least 10 animal/time point combinations and absent in at least 10 animal/time point combinations.

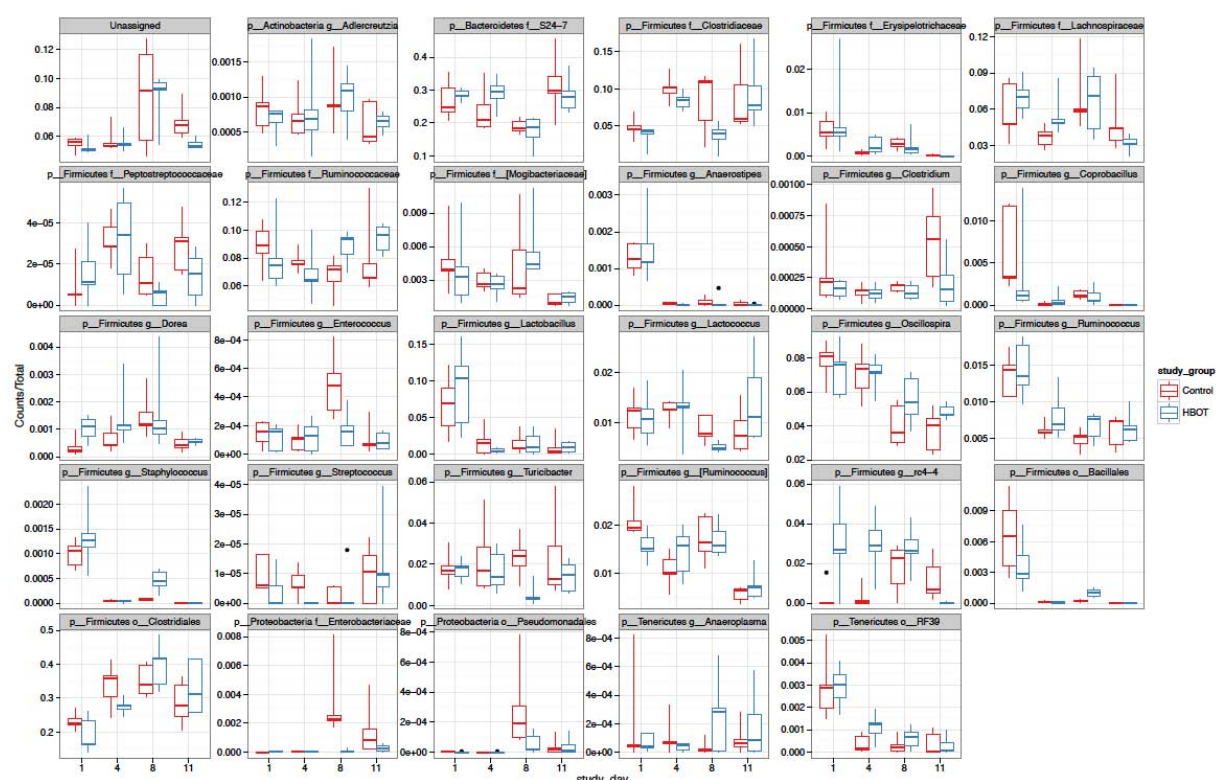

**Figure S3.** Bacterial lineages showing significant changes over time after HBOT versus controls (n=5 in each group). Longitudinal behavior was analyzed using a generalized linear mixed effects model, allowing a random intercept for each mouse, and tested for an interaction between treatment and time point. Shown are lineages achieving  $p < 0.05$  after correction for multiple comparisons.

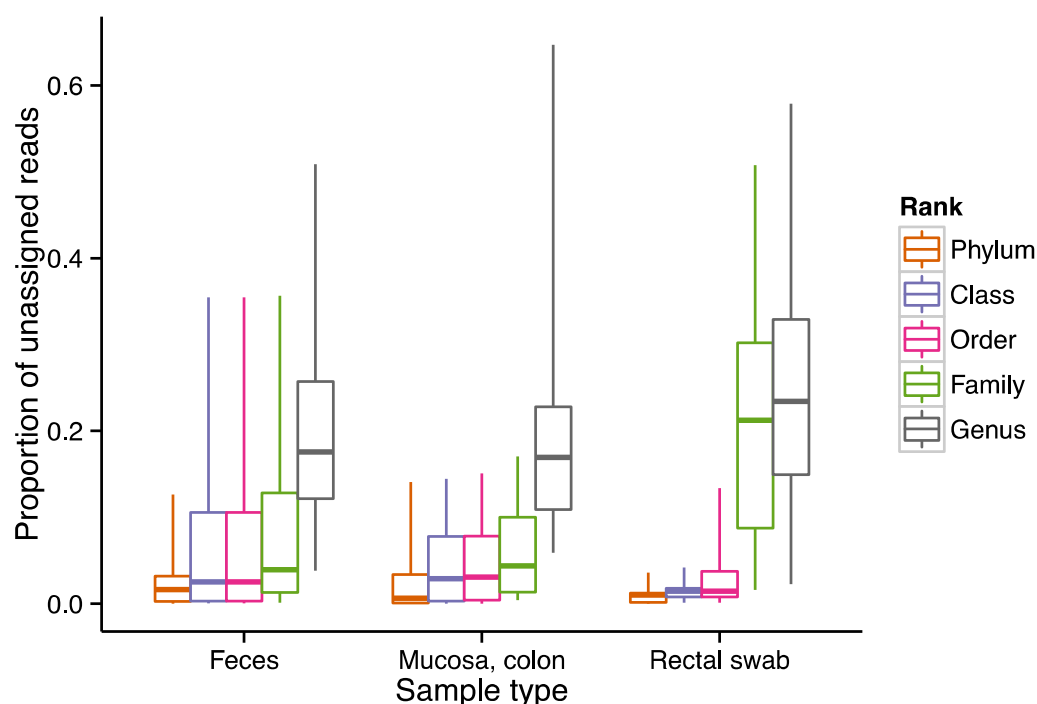

**Figure S4.** Unassigned reads at each rank in taxonomy based on sample type. An analysis using a Kruskal-Wallis test of ranked proportions was performed to determine if there was a difference in unassigned reads between sample types. There was no statistically significant difference ( $p$ -value = 0.4848).

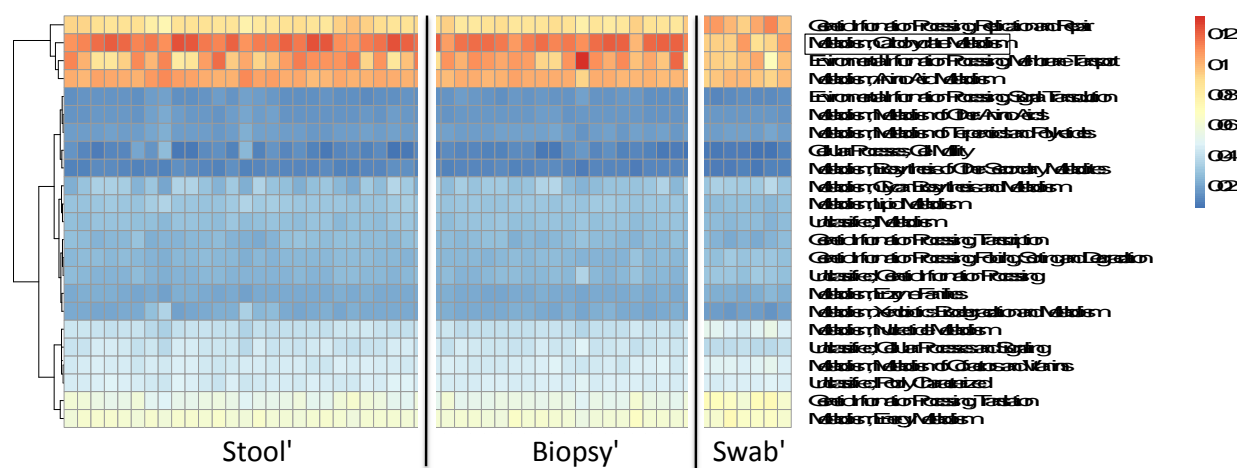

**Figure S5.** Heatmap of gene abundance assigned to major metabolic pathways inferred from 16S rRNA gene sequence information in stool, biopsy, and swab samples using PICRUSt.

**Table S1.** Oxygen tolerance and catalase activity in human rectally-associated and fecal genera.

| Genus                                                                                | Oxygen Tolerance                                     | Catalase production | Reference                                                |
|--------------------------------------------------------------------------------------|------------------------------------------------------|---------------------|----------------------------------------------------------|
| Actinobacteria Actinobacteria Actinomycetales Actinomycetaceae Actinomyces           | Facultative anaerobe                                 | Variable            | Bergey's                                                 |
| Actinobacteria Actinobacteria Actinomycetales Corynebacteriaceae Corynebacterium     | Facultative anaerobe                                 | Pos                 | Bergey's                                                 |
| Actinobacteria Actinobacteria Actinomycetales Propionibacteriaceae Propionibacterium | Facultative anaerobe but with variable aerotolerance | Pos                 | Bergey's                                                 |
| Actinobacteria Actinobacteria Coriobacteriales Coriobacteriaceae Atopobium           | "Anaerobic"                                          | Neg                 | Rodriguez Jovita et al IJSB 2009                         |
| Actinobacteria Actinobacteria Coriobacteriales Coriobacteriaceae Collinsella         | "Obligate anaerobe"                                  | Neg                 | Kageyama et al IJSB 1999                                 |
| Actinobacteria Actinobacteria Coriobacteriales Coriobacteriaceae Eggerthella         | "Obligately anaerobic"                               | Neg                 | Wade et al IJSEM 1999                                    |
| Bacteroidetes Bacteroidetes Bacteroidales Bacteroidaceae Bacteroides                 | Anaerobe or microaerophile                           | Neg                 | Bergey's                                                 |
| Bacteroidetes Bacteroidetes Bacteroidales Bacteroidaceae Megamonas                   | "Obligately Anaerobe"                                |                     | Bergey's; Chervrot et al. Int J Syst Evol Microbiol 2008 |
| Bacteroidetes Bacteroidetes Bacteroidales Porphyromonadaceae Parabacteroides         | "Obligately anaerobic"                               |                     | Sakamoto and Benno IJSEM 2006                            |
| Bacteroidetes Bacteroidetes Bacteroidales Porphyromonadaceae Porphyromonas           | "Obligately anaerobic"                               |                     | Bergey's                                                 |
| Bacteroidetes Bacteroidetes Bacteroidales Prevotellaceae Hallella                    | "Obligately anaerobic"                               | Neg                 | Moore et al IJSEM 1994                                   |
| Bacteroidetes Bacteroidetes Bacteroidales Prevotellaceae Prevotella                  | "Obligately anaerobic"                               | Neg                 | Bergey's                                                 |
| Bacteroidetes Bacteroidetes Bacteroidales Prevotellaceae Xylanibacter                | "Strictly anaerobic"                                 | Neg                 | Ueki et al IJSEM 2006                                    |
| Bacteroidetes Bacteroidetes Bacteroidales Rikenellaceae Alistipes                    | "Strictly anaerobic"                                 | Pos                 | Rautio et al IJSEM 2003                                  |
| Bacteroidetes Flavobacteria Flavobacteriales Flavobacteriaceae Cloacibacterium       | Facultative anaerobe                                 | Pos                 | Allen et al IJSEM 2006                                   |
| Deinococcus-Thermus Deinococci Deinococcales Deinococcaceae Deinococcus              | Aerobe                                               | Pos                 | Bergey's                                                 |
| Firmicutes Bacilli Lactobacillales Aerococcaceae Aerococcus                          | Aerobe                                               | Neg                 | Bergey's                                                 |
| Firmicutes Bacilli Lactobacillales Lactobacillaceae Lactobacillus                    | Facultative anaerobe or microaerophile               | Neg                 | Bergey's                                                 |
| Firmicutes Bacilli Lactobacillales Streptococcaceae Streptococcus                    | Facultative anaerobe                                 | Neg                 | Bergey's                                                 |
| Firmicutes Clostridia Clostridiales Clostridiaceae Clostridium                       | "Obligately anaerobic"                               | Neg                 | Bergey's                                                 |

|                                                                              |                           |          |                                                 |
|------------------------------------------------------------------------------|---------------------------|----------|-------------------------------------------------|
| Firmicutes Clostridia Clostridiales Incertae_Sedis_XI Anaerococcus           | "Strictly anaerobic"      |          | Ezaki et al IJSEM 2001                          |
| Firmicutes Clostridia Clostridiales Incertae_Sedis_XI Finegoldia             | "Obligately anaerobic"    |          | Murdoch et al IJSEM 2000                        |
| Firmicutes Clostridia Clostridiales Incertae_Sedis_XI Parvimonas             | "Obligately anaerobic"    |          | Tindall et al IJSEM 2006                        |
| Firmicutes Clostridia Clostridiales Incertae_Sedis_XI Peptoniphilus          | "Obligately anaerobic"    | Neg      | Ezaki et al IJSEM 2001                          |
| Firmicutes Clostridia Clostridiales Incertae_Sedis_XIII Anaerovorax          | "Strictly anaerobic"      | Neg      | Matthies et al IJSEM 2000                       |
| Firmicutes Clostridia Clostridiales Incertae_Sedis_XIII Mogibacterium        | "Strictly anaerobic"      | Neg      | Nakazawa et al IJSEM 2000                       |
| Firmicutes Clostridia Clostridiales Incertae_Sedis_XV Dethiosulfovibrio      | Aerotolerant              |          | Magot et al IJSEM 1997                          |
| Firmicutes Clostridia Clostridiales Lachnospiraceae Bryantella               | "Anaerobic"               | Neg      | Wolin et al IJSEM 2004                          |
| Firmicutes Clostridia Clostridiales Lachnospiraceae Butyrivibrio             | "Anaerobic"               | Neg      | Bergey's                                        |
| Firmicutes Clostridia Clostridiales Lachnospiraceae Coprococcus              | "Obligately anaerobic"    | Neg      | Bergey's                                        |
| Firmicutes Clostridia Clostridiales Lachnospiraceae Dorea                    | "Obligately anaerobic"    | Neg      | Taras et al IJSEM 2002                          |
| Firmicutes Clostridia Clostridiales Lachnospiraceae Lachnospira              | "Anaerobic"               | Neg      | Bergey's                                        |
| Firmicutes Clostridia Clostridiales Lachnospiraceae Roseburia                | "Obligately anaerobic"    | Neg      | Bergey's                                        |
| Firmicutes Clostridia Clostridiales Peptococcaceae Peptococcus               | "Anaerobic"               |          | Bergey's                                        |
| Firmicutes Clostridia Clostridiales Peptostreptococcaceae Peptostreptococcus | "Obligately Anaerobic"    | Variable | Bergey's                                        |
| Firmicutes Clostridia Clostridiales Ruminococcaceae Acetanaerobacterium      | "Anaerobic"               | Neg      | Chen et al IJSEM 2001                           |
| Firmicutes Clostridia Clostridiales Ruminococcaceae Anaerotruncus            | "Strictly anaerobic"      | Neg      | Lawson et al IJSEM 2004                         |
| Firmicutes Clostridia Clostridiales Ruminococcaceae Faecalibacterium         | "Obligately anaerobic"    |          | Duncan et al IJSEM 2002                         |
| Firmicutes Clostridia Clostridiales Ruminococcaceae Papillibacter            | "Strictly anaerobic"      |          | Defnoun et al IJSEM 2000                        |
| Firmicutes Clostridia Clostridiales Ruminococcaceae Ruminococcus             | "Anaerobic"               | Neg      | Bergey's                                        |
| Firmicutes Clostridia Clostridiales Ruminococcaceae Subdoligranulum          | "Strictly anaerobic"      | Neg      | Holstrom et al Anaerobe 2004                    |
| Firmicutes Clostridia Clostridiales Veillonellaceae Acidaminococcus          | Obiligate anaerobe        | Neg      | Bergey's: J Bacteriol. May 1969; 98(2): 756–766 |
| Firmicutes Clostridia Clostridiales Veillonellaceae Dialister                | "Anaerobic"               | Neg      | Moore et al IJSEM 1994                          |
| Firmicutes Clostridia Clostridiales Veillonellaceae Megasphaera              | "Fermentative metabolism" | Neg      | Bergey's                                        |
| Firmicutes Clostridia Clostridiales Veillonellaceae Succinispira             | "Obligately Anaerobic"    |          | Janssen et al IJSEM 1999;                       |

|                                                                                                      |                                |           |                                              |
|------------------------------------------------------------------------------------------------------|--------------------------------|-----------|----------------------------------------------|
|                                                                                                      |                                |           | Schmitz, RA et al. Prokaryotes 2006;2:86-101 |
| Firmicutes Erysipelotrichi Erysipelotrichales Erysipelotrichaceae Catenibacterium                    | "Obligatory anaerobic"         |           | Kageyama et al IJSEM 2000                    |
| Firmicutes Erysipelotrichi Erysipelotrichales Erysipelotrichaceae Coprobacillus                      | "Obligatorily anaerobic"       |           | Kageyama et al IJSEM 2000                    |
| Firmicutes Erysipelotrichi Erysipelotrichales Erysipelotrichaceae Erysipelotrichaceae_Incertae_Sedis | Facultative anaerobe or aerobe |           | Bergey's                                     |
| Firmicutes Erysipelotrichi Erysipelotrichales Erysipelotrichaceae Holdemania                         | "Strictly anaerobic"           | Neg       | Willems et al IJSEM 1997                     |
| Firmicutes Erysipelotrichi Erysipelotrichales Erysipelotrichaceae Turicibacter                       | "Strictly anaerobic"           | Neg       | Bosshard et al IJSEM 2002                    |
| Fusobacteria Fusobacteria Fusobacteriales Fusobacteriaceae Fusobacterium                             | "Obligately anaerobic"         |           | Bergey's                                     |
| Fusobacteria Fusobacteria Fusobacteriales Fusobacteriaceae Sneathia                                  | "Fermentative metabolism"      | Neg       | Collins et al IJSEM 2002                     |
| Proteobacteria Alphaproteobacteria Sphingomonadales Sphingomonadaceae Sphingobium                    | Aerobe                         | Pos       | Bergey's                                     |
| Proteobacteria Betaproteobacteria Burkholderiales Alcaligenaceae Sutterella                          | Microaerophile or anaerobe     |           | Wexler et al IJSB 1996                       |
| Proteobacteria Betaproteobacteria Burkholderiales Burkholderiaceae Burkholderia                      | Aerobe                         | Pos       | Yabuuchi et al IJSEM 1993                    |
| Proteobacteria Betaproteobacteria Burkholderiales Comamonadaceae Diaphorobacter                      | Aerobe                         | Pos       | Khan et al IJSEM 2003                        |
| Proteobacteria Betaproteobacteria Burkholderiales Incertae_sedis_5 Aquabacterium                     | Aerobe or microaerophile       | Neg       | Kalmbach et al IJSEM 1999                    |
| Proteobacteria Betaproteobacteria Burkholderiales Oxalobacteraceae Janthinobacterium                 | Aerobe                         | Pos       | Bergey's                                     |
| Proteobacteria Betaproteobacteria Burkholderiales Oxalobacteraceae Massilia                          | Aerobe                         | Pos       | La Scola et al IJSEM 2000                    |
| Proteobacteria Deltaproteobacteria Desulfovibrionales Desulfovibrionaceae Bilophila                  | "Obligately anaerobic"         | Pos       | Baron et al IJSEM 1990                       |
| Proteobacteria Epsilonproteobacteria Campylobacteriales Campylobacteraceae Campylobacter             | Microaerophile                 | Variabl e | Bergey's                                     |
| Proteobacteria Gammaproteobacteria Chromatiales Chromatiaceae Rheinheimera                           | Facultative anaerobe or aerobe | Pos       | Brettar et al IJSEM 2002                     |
| Proteobacteria Gammaproteobacteria Enterobacteriales Enterobacteriaceae Citrobacter                  | Facultative anaerobe           | Pos       | Bergey's                                     |
| Proteobacteria Gammaproteobacteria Enterobacteriales Enterobacteriaceae Enterobacter                 | Facultative anaerobe           | Pos       | Bergey's                                     |
| Proteobacteria Gammaproteobacteria Enterobacteriales Enterobacteriaceae Escherichia                  | Facultative anaerobe           | Pos       | Bergey's                                     |
| Proteobacteria Gammaproteobacteria Pseudomonadales Moraxellaceae Acinetobacter                       | Aerobe                         | Pos       | Bergey's                                     |
| Proteobacteria Gammaproteobacteria Pseudomonadales Pseudomonadaceae Pseudomonas                      | Aerobe                         | Pos       | Bergey's                                     |

|                                                                            |                      |     |                      |
|----------------------------------------------------------------------------|----------------------|-----|----------------------|
| Proteobacteria Gammaproteobacteria Vibrionales Vibrionaceae Vibrio         | Facultative anaerobe | Pos | Bergey's             |
| Proteobacteria Gammaproteobacteria Xanthomonadales Xanthomonadaceae Dyella | Aerobe               | Pos | Xie et al IJSEM 2005 |
| Tenericutes Mollicutes Mycoplasmatales Mycoplasmataceae Mycoplasma         | Facultative anaerobe | Neg | Bergey's             |

**Table S2.** The Mucosally-Associated Microbiota Consortium

| Phylum         | Genus                     | Oxygen Tolerance                  | Catalase | Asaccharolytic | p value* |
|----------------|---------------------------|-----------------------------------|----------|----------------|----------|
| Actinobacteria | <i>Corynebacterium</i>    | Aerobic and Facultative Anaerobes | Positive | No             | 0.0092   |
| Bacteroidetes  | <i>Porphyromonas</i>      | Obligate Anaerobe                 | Negative | Yes            | 0.0092   |
| Firmicutes     | <i>Anaerococcus</i>       | Obligate Anaerobe                 | Negative | Yes            | 0.0023   |
| Firmicutes     | <i>Finnegoldia</i>        | Obligate Anaerobe                 | Negative | Yes            | 0.0035   |
| Firmicutes     | <i>Murdochiella</i>       | Obligate Anaerobe                 | Negative | Yes            | 0.016    |
| Firmicutes     | <i>Peptoniphilus</i>      | Obligate Anaerobe                 | Negative | Yes            | 0.0023   |
| Proteobacteria | <i>Campylobacter</i>      | Microaerophilic                   | Positive | Yes            | 0.0023   |
| Proteobacteria | <i>Enterobacteriaceae</i> | Facultative Anaerobes             | Positive | No             | 0.068    |

\*Compared to stool, FDR corrected

## References

1. Esipova TV, *et al.* (2011) Two new "protected" oxyphors for biological oximetry: properties and application in tumor imaging. *Analytical Chemistry* 83(22):8756-8765.
2. Rozhkov V, Wilson D, & Vinogradov S (2002) Phosphorescent Pd porphyrin-dendrimers: Tuning core accessibility by varying the hydrophobicity of the dendritic matrix. *Macromolecules* 35(6):1991-1993.
3. Khajepour M, *et al.* (2003) Accessibility of oxygen with respect to the heme pocket in horseradish peroxidase. *Proteins-Structure Function and Genetics* 53(3):656-666.
4. Mani T, Niedzwiedzki DM, & Vinogradov SA (2012) Generation of Phosphorescent Triplet States via Photoinduced Electron Transfer: Energy and Electron Transfer Dynamics in Pt Porphyrin-Rhodamine B Dyads. *J. Phys. Chem. A.* 116:3598–3610.
5. Wu GD, *et al.* (2011) Linking long-term dietary patterns with gut microbial enterotypes. *Science* 334(6052):105-108.
6. Thom SR (1990) Antagonism of carbon monoxide-mediated brain lipid peroxidation by hyperbaric oxygen. *Toxicol Appl Pharmacol* 105(2):340-344.
7. Caporaso JG, *et al.* (2010) QIIME allows analysis of high-throughput community sequencing data. *Nat Methods* 7(5):335-336.
8. Langille MG, *et al.* (2013) Predictive functional profiling of microbial communities using 16S rRNA marker gene sequences. *Nat Biotechnol* 31(9):814-821.
